# Supplementary material for: Multifunctional long-lived catalysts for direct hydrogenative conversion of CO2 to liquid hydrocarbons with upscaling C5+ productivity
Source: Royal Society of Chemistry journal article supplement (doi:10.1039/d2ta05138a), 2022-01-01
Supplement: d2ta05138a1.pdf [file d2ta05138a1.pdf]

Supplementary Information for

Multifunctional long-lived catalysts for direct  
hydrogenative conversion of CO<sub>2</sub> to liquid  
hydrocarbons with upscaling C<sub>5+</sub> productivity

Yongseok Kim, Yohan Song, Yuhwan Kim, and Kyungsu Na\*

Department of Chemistry, Chonnam National University, 77 Yongbong-ro, Buk-gu, Gwangju  
61186, Republic of Korea

\*To whom correspondence should be addressed:

E-mail (Kyungsu Na) [kyungsu\\_na@chonnam.ac.kr](mailto:kyungsu_na@chonnam.ac.kr)

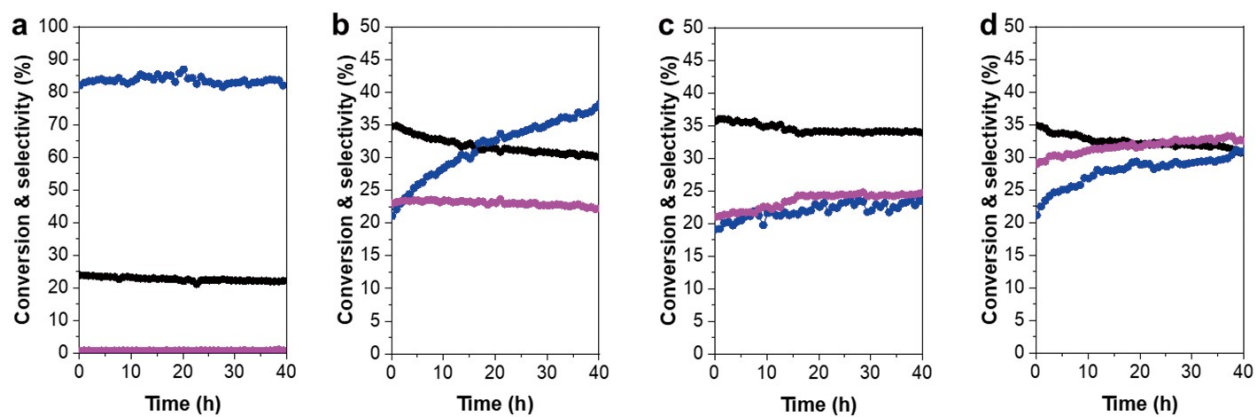

**Fig. S1** Reaction profiles of the (a) CuAl<sub>2</sub>O<sub>4</sub> (entry 1), (b) 9Fe/CuAl<sub>2</sub>O<sub>4</sub> (entry 2), (c) 22Fe/CuAl<sub>2</sub>O<sub>4</sub> (entry 3), and (d) 50Fe/CuAl<sub>2</sub>O<sub>4</sub> (entry 4) catalysts for the 40 h CO<sub>2</sub> hydrogenation reaction. The CO<sub>2</sub> conversion (black dots), CO selectivity (blue dots), and CH<sub>4</sub> selectivity (pink dots) are provided.

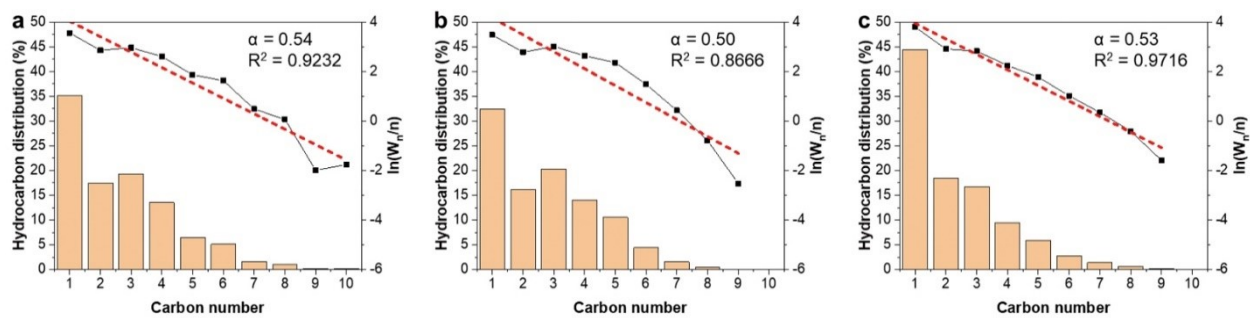

**Fig. S2** Hydrocarbon distributions obtained using the (a) 9Fe/CuAl<sub>2</sub>O<sub>4</sub> (entry 2), (b) 22Fe/CuAl<sub>2</sub>O<sub>4</sub> (entry 3), and (c) 50Fe/CuAl<sub>2</sub>O<sub>4</sub> (entry 4) catalysts, with the corresponding Anderson-Schultz-Flory plots (right y-axis) that provide the chain growth probability ( $\alpha$ ).

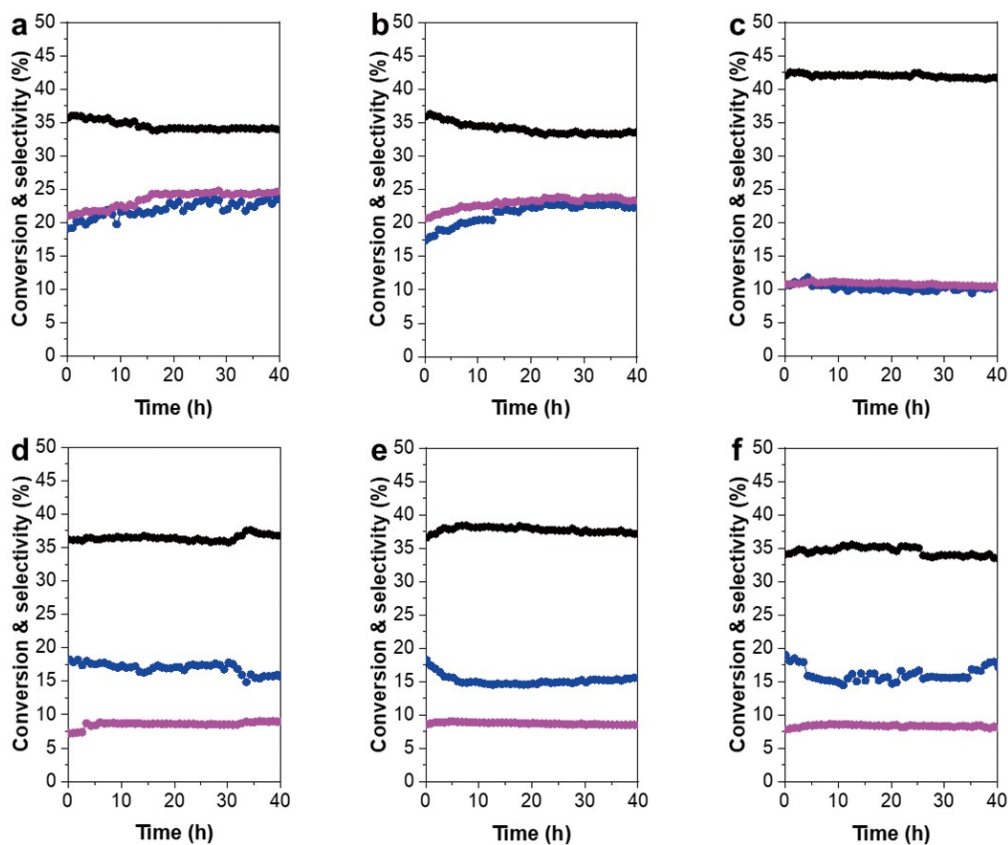

**Fig. S3** Reaction profiles of the (a) 22Fe/CuAl<sub>2</sub>O<sub>4</sub> (entry 3), (b) 22Fe0.8K/CuAl<sub>2</sub>O<sub>4</sub> (entry 5), (c) 22Fe3K/CuAl<sub>2</sub>O<sub>4</sub> (entry 6), (d) 22Fe7K/CuAl<sub>2</sub>O<sub>4</sub> (entry 7), (e) 22Fe15K/CuAl<sub>2</sub>O<sub>4</sub> (entry 8), and (f) 22Fe22K/CuAl<sub>2</sub>O<sub>4</sub> (entry 9) catalysts for the 40 h CO<sub>2</sub> hydrogenation reaction. The CO<sub>2</sub> conversions (black dots), CO selectivities (blue dots), and CH<sub>4</sub> selectivities (pink dots) are provided.

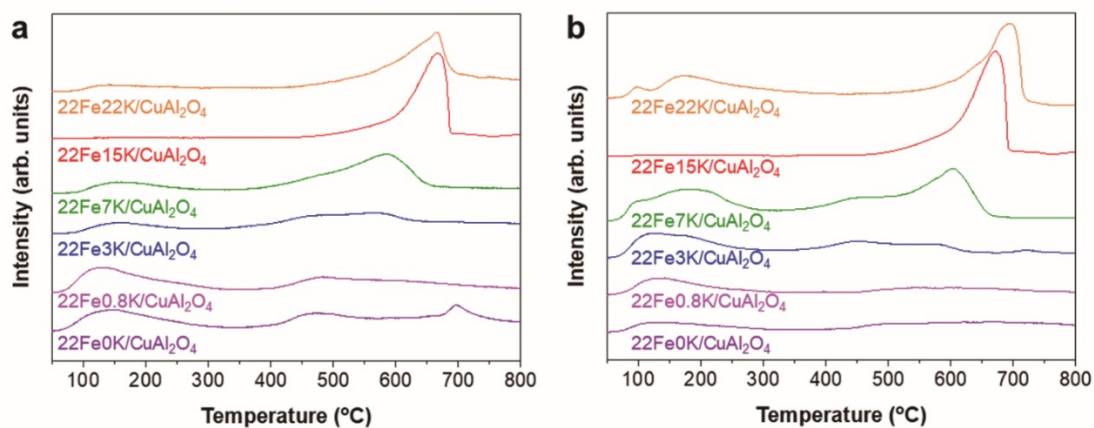

**Fig. S4** (a) CO<sub>2</sub>-TPD-MS and (b) NH<sub>3</sub>-TPD-MS of the 22Fe/CuAl<sub>2</sub>O<sub>4</sub> and K-promoted catalysts. 22Fe/CuAl<sub>2</sub>O<sub>4</sub> (violet), 22Fe0.8K/CuAl<sub>2</sub>O<sub>4</sub> (pink), 22Fe3K/CuAl<sub>2</sub>O<sub>4</sub> (blue), 22Fe7K/CuAl<sub>2</sub>O<sub>4</sub> (green), 22Fe15K/CuAl<sub>2</sub>O<sub>4</sub> (red), and 22Fe22K/CuAl<sub>2</sub>O<sub>4</sub> (orange) (listed from the bottom to the top).

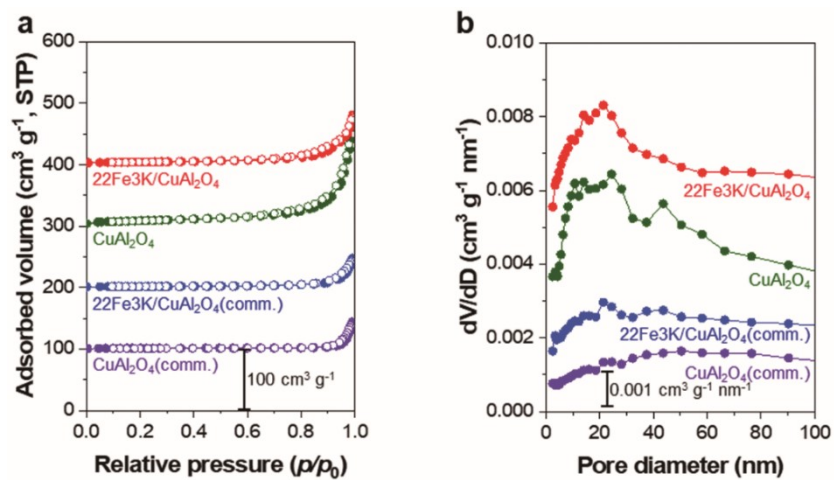

**Fig. S5** (a) N<sub>2</sub> adsorption isotherms of 22Fe3K/CuAl<sub>2</sub>O<sub>4</sub> (red) and CuAl<sub>2</sub>O<sub>4</sub> (green) having a mesoporous structure in comparison with 22Fe3K/CuAl<sub>2</sub>O<sub>4</sub> (blue) and CuAl<sub>2</sub>O<sub>4</sub> (purple) without having a mesoporous structure (from top to bottom), and (b) their corresponding pore size distributions derived from the adsorption branches in (a) using the BJH algorithm.

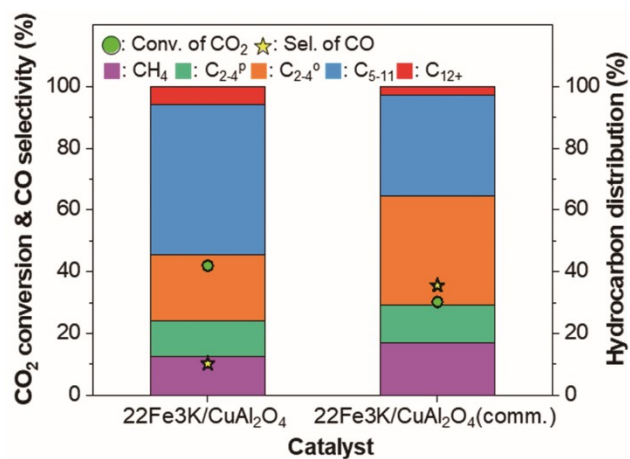

**Fig. S6** Comparison of catalytic performance of 22Fe<sub>3</sub>K/CuAl<sub>2</sub>O<sub>4</sub> and 22Fe<sub>3</sub>K/CuAl<sub>2</sub>O<sub>4</sub>(comm.) in the 40 h CO<sub>2</sub> hydrogenation reaction. The CO<sub>2</sub> conversions, CO selectivity, and hydrocarbon distributions are also listed in Table S3 (reaction condition: 320 °C, 3.0 MPa, H<sub>2</sub>:CO<sub>2</sub> = 3:1, GHSV = 10 000 mL g<sub>cat</sub><sup>-1</sup> h<sup>-1</sup>).

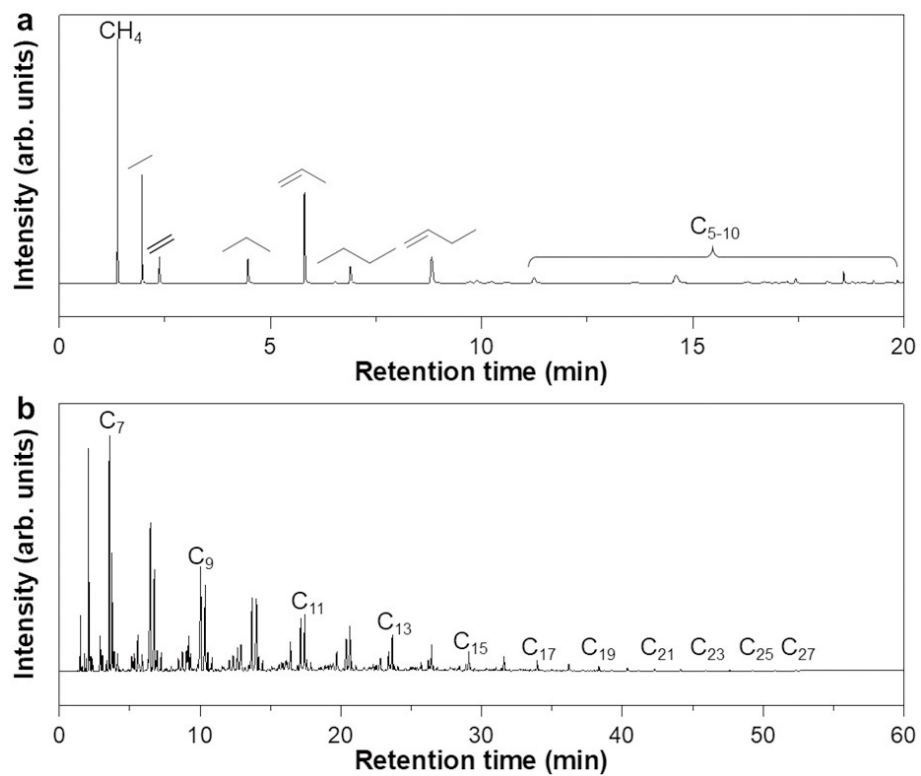

**Fig. S7** GC FID chromatograms of the (a) gaseous and (b) liquid products collected in the cold trap during the 40 h reaction in the presence of 22Fe3K/CuAl<sub>2</sub>O<sub>4</sub> (entry 6).



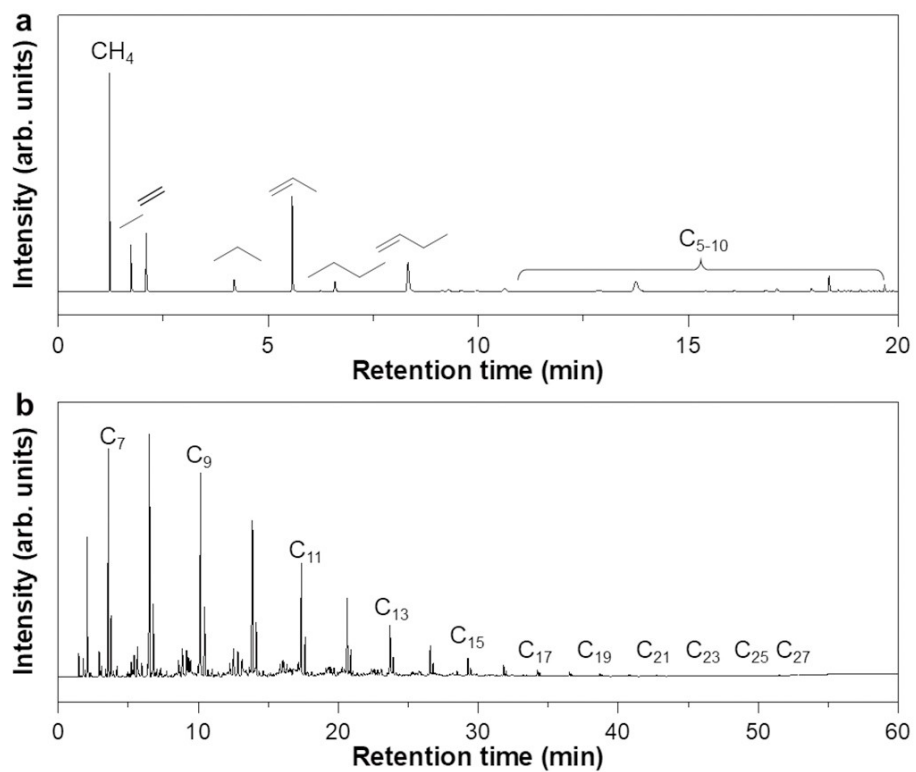

**Fig. S8** GC-FID chromatograms of the (a) gaseous and (b) liquid products collected by the cold trap during the 40 h reaction in the presence of  $^{22}\text{Fe}7\text{K}/\text{CuAl}_2\text{O}_4$  (entry 7).

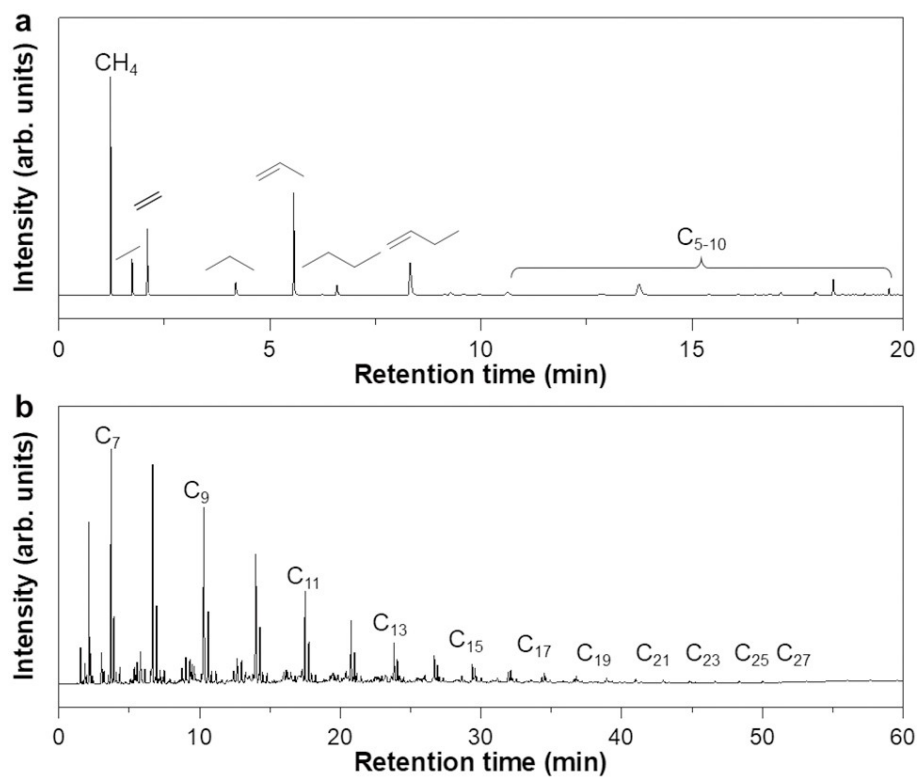

**Fig. S9** GC-FID chromatograms of the (a) gaseous and (b) liquid products collected by the cold trap during the 40 h reaction in the presence of  $^{22}\text{Fe}^{15}\text{K}/\text{CuAl}_2\text{O}_4$  (entry 8).

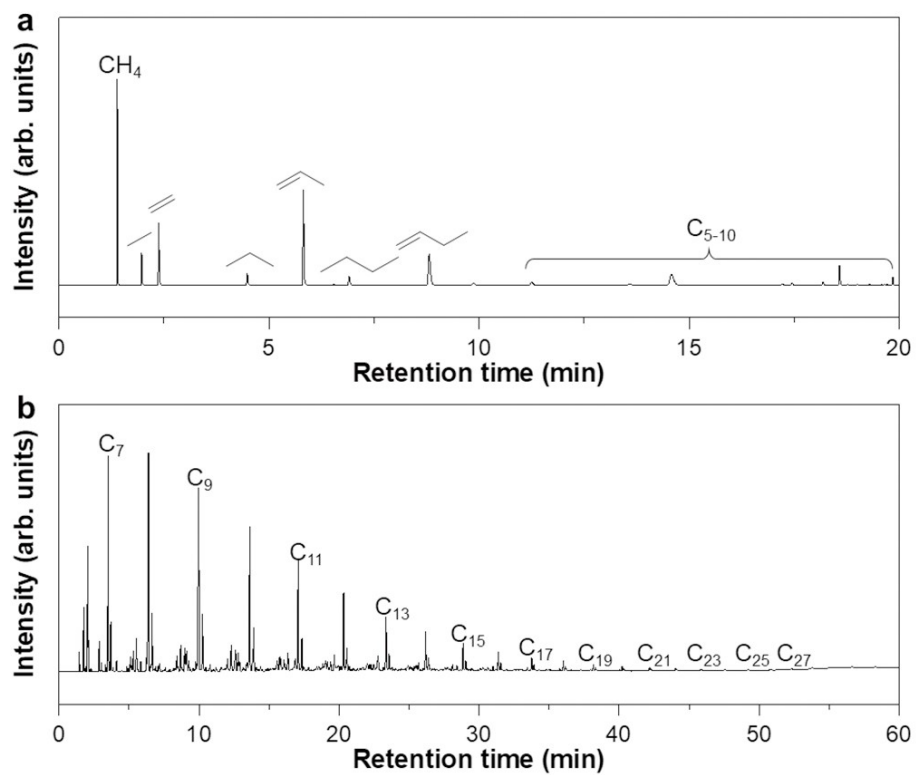

**Fig. S10** GC-FID chromatograms of the (a) gaseous and (b) liquid products collected by the cold trap during the 40 h reaction in the presence of  $^{22}\text{Fe}^{22}\text{K}/\text{CuAl}_2\text{O}_4$  (entry 9).

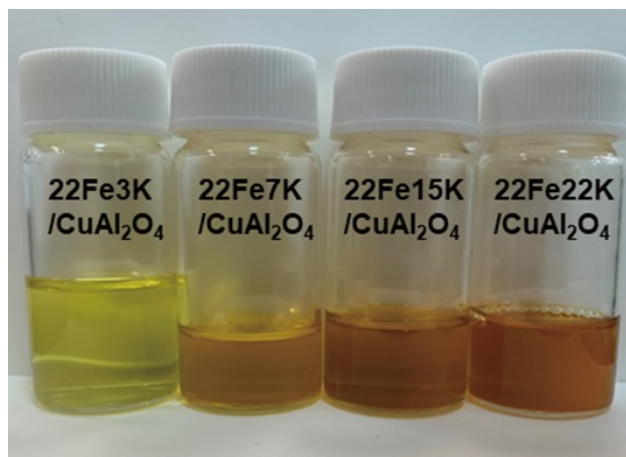

**Fig. S11** Photo of the liquid-phase products collected by the cold trap during the 40 h CO<sub>2</sub> hydrogenation reaction performed in the presence of 22Fe3K/CuAl<sub>2</sub>O<sub>4</sub> (entry 6), 22Fe7K/CuAl<sub>2</sub>O<sub>4</sub> (entry 7), 22Fe15K/CuAl<sub>2</sub>O<sub>4</sub> (entry 8), and 22Fe22K/CuAl<sub>2</sub>O<sub>4</sub> (entry 9) (from left to right).

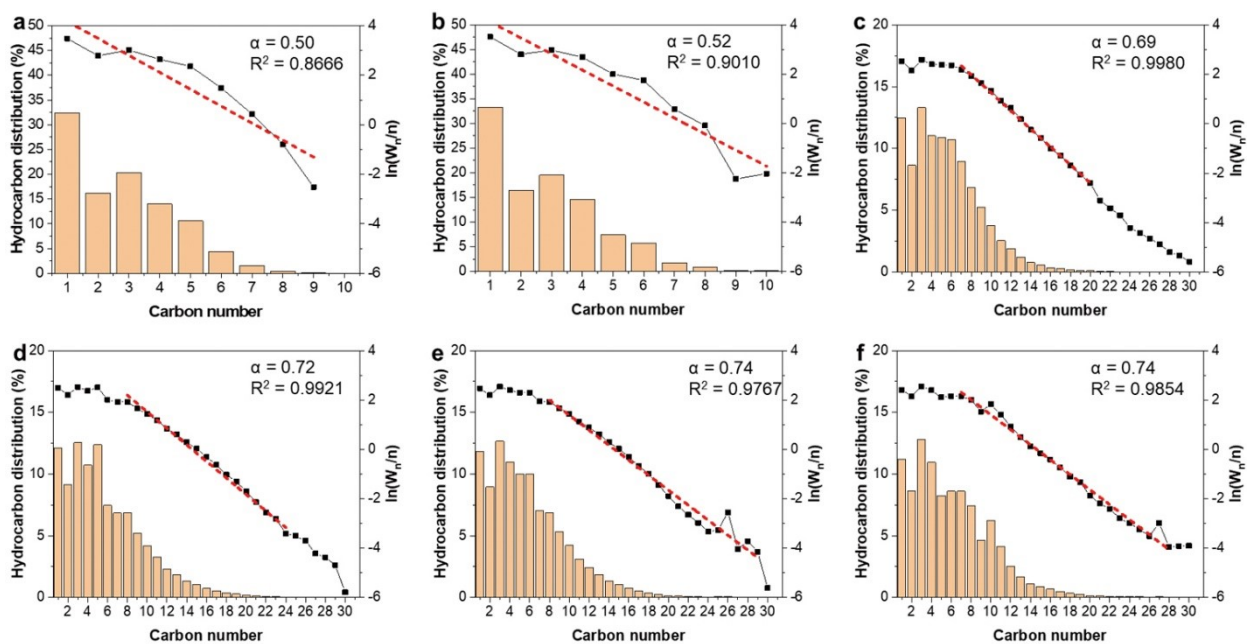

**Fig. S12** Hydrocarbon distributions of the (a)  $22\text{Fe}/\text{CuAl}_2\text{O}_4$  (entry 3), (b)  $22\text{Fe}0.8\text{K}/\text{CuAl}_2\text{O}_4$  (entry 5), (c)  $22\text{Fe}3\text{K}/\text{CuAl}_2\text{O}_4$  (entry 6), (d)  $22\text{Fe}7\text{K}/\text{CuAl}_2\text{O}_4$  (entry 7), (e)  $22\text{Fe}15\text{K}/\text{CuAl}_2\text{O}_4$  (entry 8), and (f)  $22\text{Fe}22\text{K}/\text{CuAl}_2\text{O}_4$  (entry 9) catalysts with their corresponding Anderson-Schultz-Flory plots (right y-axis) providing the chain growth probability ( $\alpha$ ).

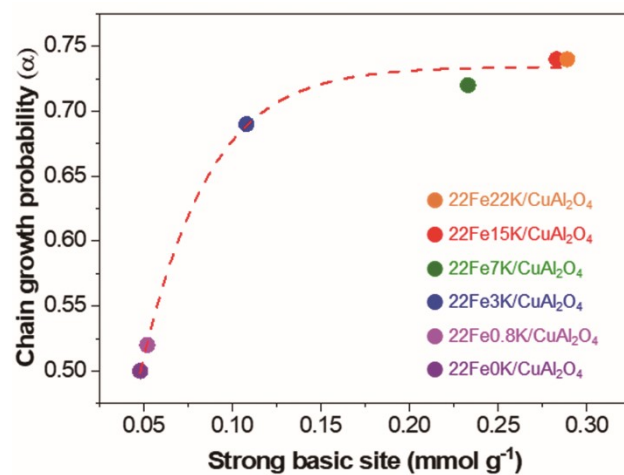

**Fig. S13** Correlation graph between amount of strong basic sites of the catalysts with different K loadings (x-axis) and chain growth probability ( $\alpha$ ) (y-axis).

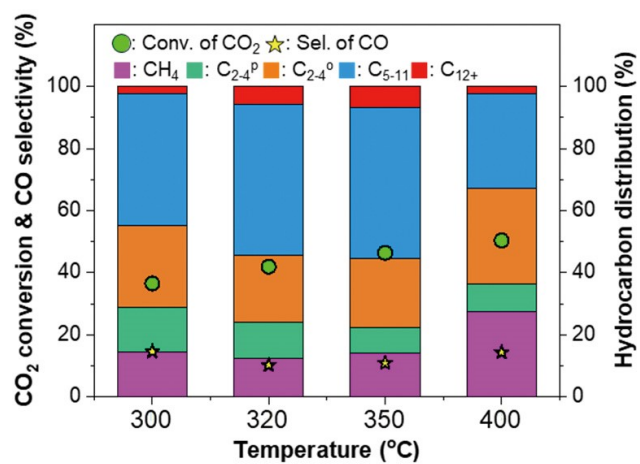

**Fig. S14** Effect of the reaction temperature on the catalytic performance of the 22Fe3K/CuAl<sub>2</sub>O<sub>4</sub> catalyst in the 40 h CO<sub>2</sub> hydrogenation reaction. The CO<sub>2</sub> conversions, CO selectivity, and hydrocarbon distributions are also listed in Table S4.

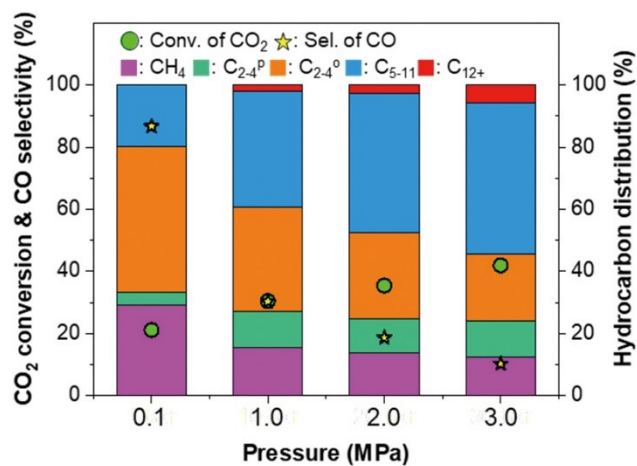

**Fig. S15** Effect of the reaction pressure on the catalytic performance of the 22Fe3K/CuAl<sub>2</sub>O<sub>4</sub> catalyst in the 40 h CO<sub>2</sub> hydrogenation reaction. The CO<sub>2</sub> conversions, CO selectivity, and hydrocarbon distributions are also listed in Table S5.



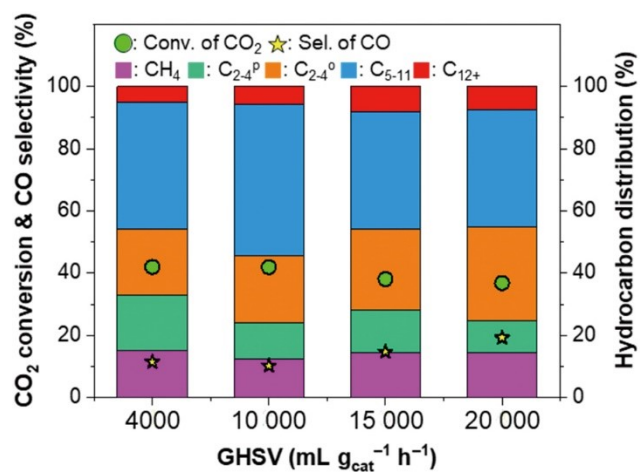

**Fig. S16** Effect of the GHSV on the catalytic performance of the 22Fe3K/CuAl<sub>2</sub>O<sub>4</sub> catalyst in the 40 h CO<sub>2</sub> hydrogenation reaction. The CO<sub>2</sub> conversions, CO selectivity, and hydrocarbon distributions are also listed in Table S6.

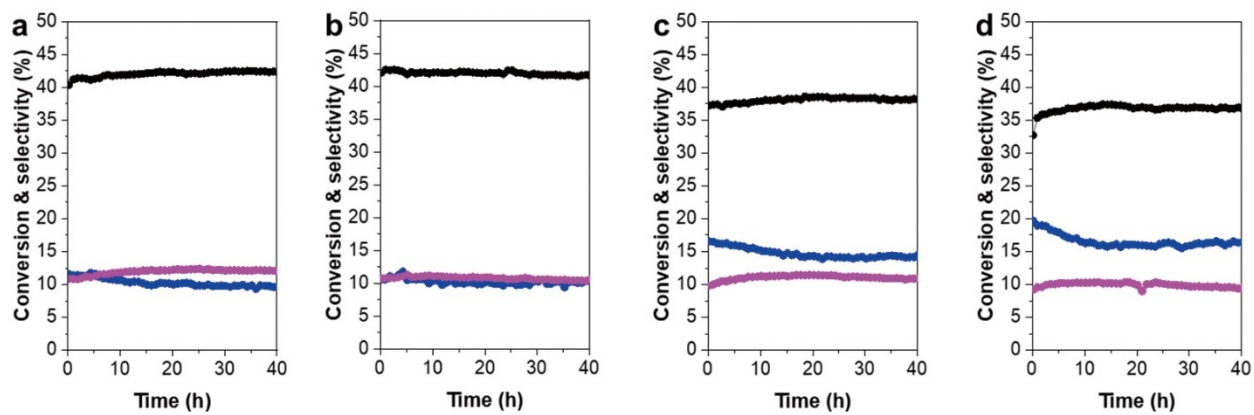

**Fig. S17** Reaction profiles of the 22Fe3K/CuAl<sub>2</sub>O<sub>4</sub> catalyst for the 40 h CO<sub>2</sub> hydrogenation reaction. The CO<sub>2</sub> conversions (black dots), CO selectivity (blue dots), and CH<sub>4</sub> selectivity (pink dots) are provided as a function of the GHSV. (a) 4000, (b) 10 000, (c) 15 000, and (d) 20 000 mL g<sub>cat</sub><sup>-1</sup> h<sup>-1</sup>.

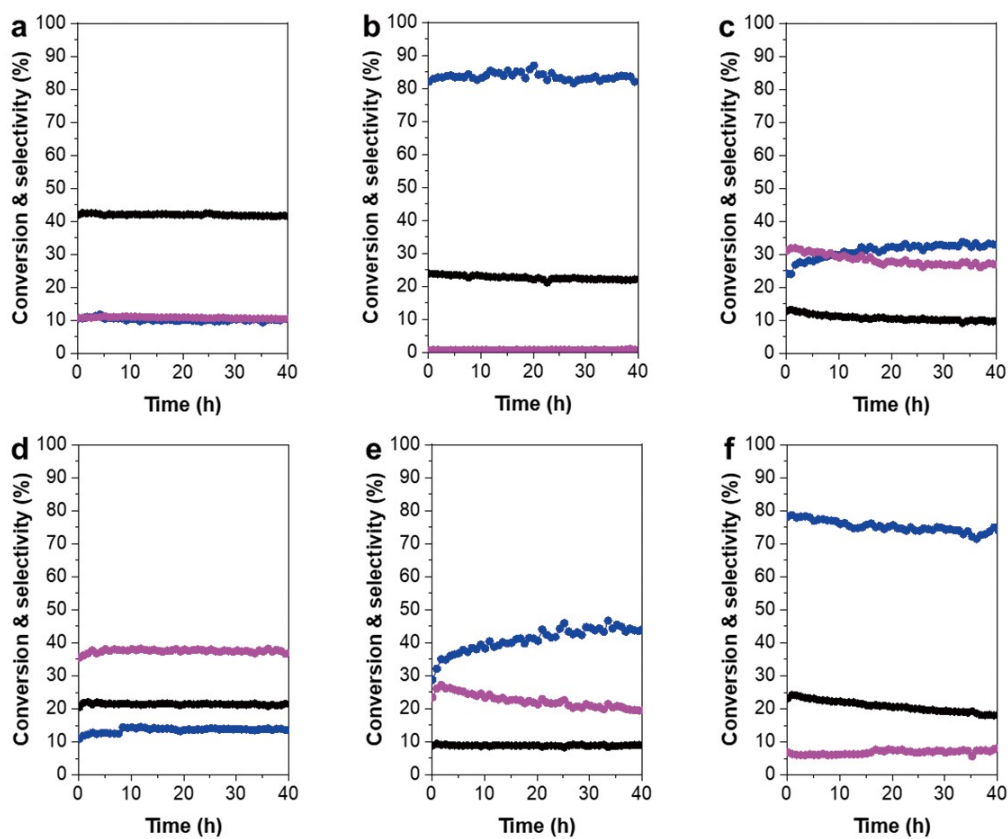

**Fig. S18** Reaction profiles of the (a) 22Fe3K/CuAl<sub>2</sub>O<sub>4</sub>, (b) CuAl<sub>2</sub>O<sub>4</sub>, (c) 22Fe/SiO<sub>2</sub>, (d) Fe<sub>2</sub>O<sub>3</sub>, (e) 22Fe3K/SiO<sub>2</sub>, and (f) physically mixed 22Fe3K/SiO<sub>2</sub>+CuAl<sub>2</sub>O<sub>4</sub> (P.M.) catalysts for the 40 h CO<sub>2</sub> hydrogenation reaction. The CO<sub>2</sub> conversions (black dots), CO selectivity (blue dots), and CH<sub>4</sub> selectivity (pink dots) are provided.

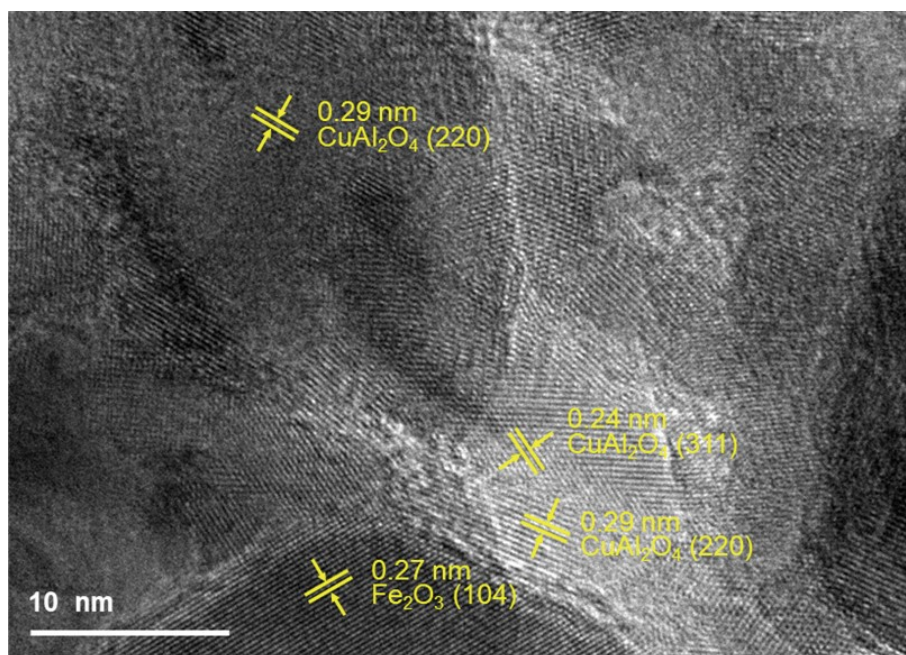

**Fig. S19** Magnified HR-TEM image of Fig. 3c showing the distinguishable lattice planes of CuAl<sub>2</sub>O<sub>4</sub> (220), CuAl<sub>2</sub>O<sub>4</sub> (311), and Fe<sub>2</sub>O<sub>3</sub> (104) that interact on an atomic length scale.

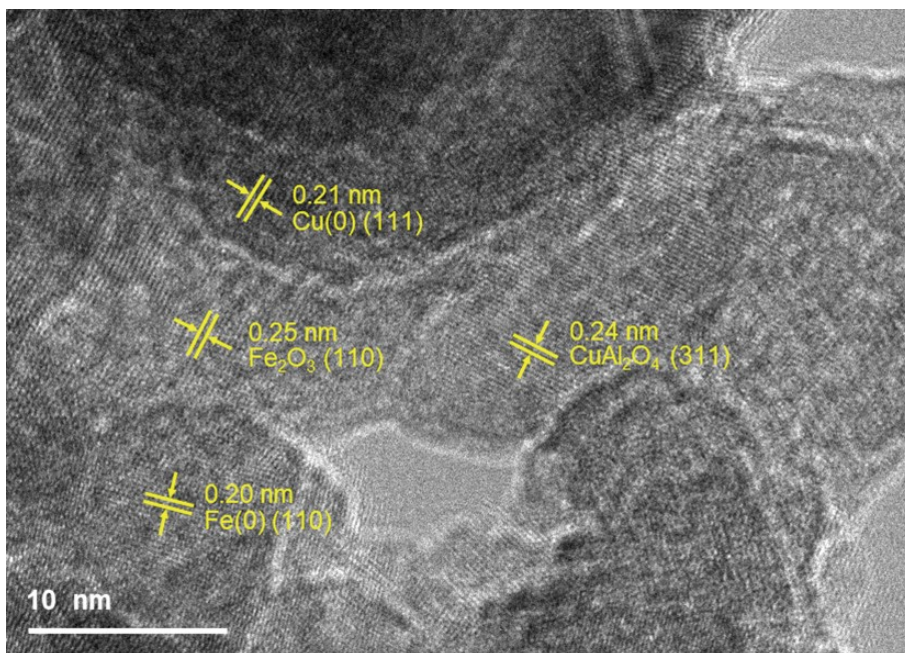

**Fig. S20** Magnified HR-TEM image of Fig. 3g showing the distinguishable lattice planes of CuAl<sub>2</sub>O<sub>4</sub> (311), Cu(0) (111), and Fe(0) (110) that interact on an atomic length scale.

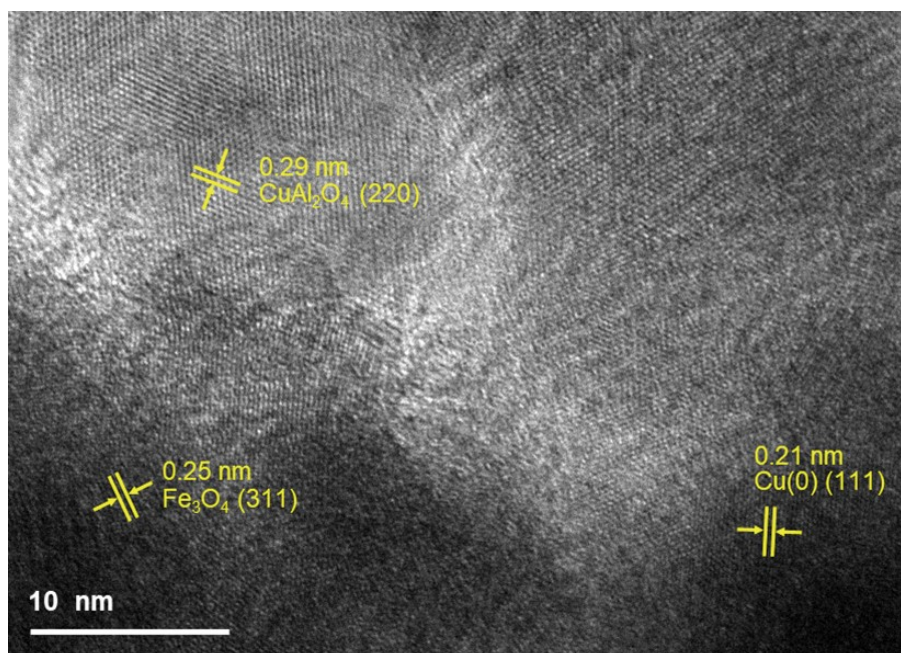

**Fig. S21** Magnified HR-TEM image of Fig. 3j showing the distinguishable lattice planes of CuAl<sub>2</sub>O<sub>4</sub> (220), Cu(0) (111), and Fe<sub>3</sub>O<sub>4</sub> (311) that interact on an atomic length scale.

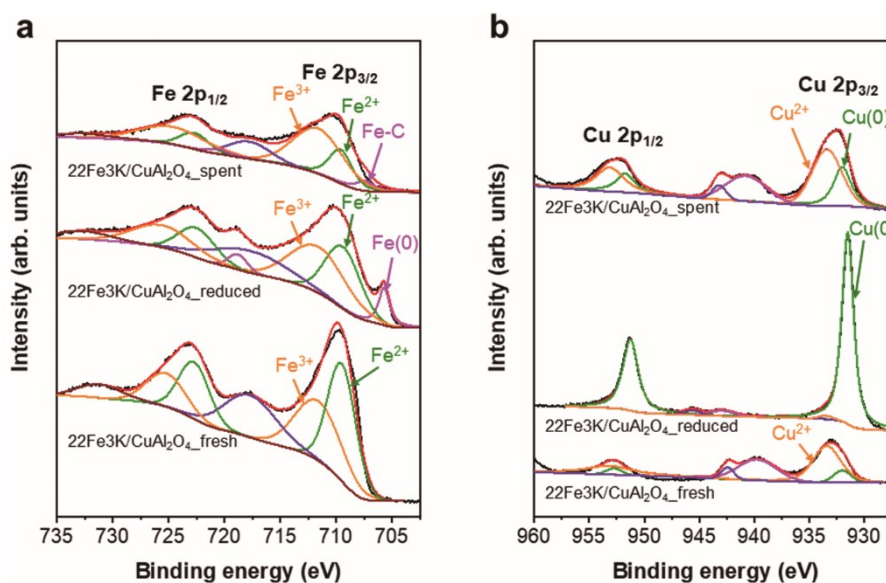

**Fig. S22** XPS spectra of 22Fe3K/CuAl<sub>2</sub>O<sub>4</sub> catalysts in a fresh form (bottom), a reduced form by H<sub>2</sub> pretreatment (middle), and a spent form after reaction (top), showing the (a) Fe 2p and (b) Cu 2p regions separately. The XPS profile in black color is the experimental data, the XPS profiles in orange, green and purple colors are the deconvoluted peaks, and the XPS profile in red color is the fitted profile from the deconvoluted peaks.

**Table S1** Elemental composition of the K-containing  $22\text{Fe}/\text{CuAl}_2\text{O}_4$  catalysts determined by ICP–OES.

| Sample                                           | Fe (wt.%) | K (wt.%) | Cu (wt.%) | Al (wt.%) |
|--------------------------------------------------|-----------|----------|-----------|-----------|
| $\text{CuAl}_2\text{O}_4$                        | 0.0       | 0.0      | 39.4      | 31.3      |
| $22\text{Fe}0\text{K}/\text{CuAl}_2\text{O}_4$   | 24.1      | 0.0      | 28.0      | 21.8      |
| $22\text{Fe}0.8\text{K}/\text{CuAl}_2\text{O}_4$ | 24.9      | 0.7      | 27.7      | 21.7      |
| $22\text{Fe}3\text{K}/\text{CuAl}_2\text{O}_4$   | 24.1      | 2.7      | 26.9      | 21.0      |
| $22\text{Fe}7\text{K}/\text{CuAl}_2\text{O}_4$   | 23.5      | 6.2      | 25.6      | 19.5      |
| $22\text{Fe}15\text{K}/\text{CuAl}_2\text{O}_4$  | 24.8      | 13.5     | 22.5      | 17.8      |
| $22\text{Fe}22\text{K}/\text{CuAl}_2\text{O}_4$  | 22.9      | 19.6     | 19.9      | 16.0      |



**Table S2** Comparison of BET surface areas ( $S_{\text{BET}}$ ) and total pore volumes ( $V_p$ ).

| Sample                                            | $S_{\text{BET}}$ ( $\text{m}^2 \text{g}^{-1}$ ) | $V_p$ ( $\text{cm}^3 \text{g}^{-1}$ ) |
|---------------------------------------------------|-------------------------------------------------|---------------------------------------|
| $\text{CuAl}_2\text{O}_4$                         | 31                                              | 0.23                                  |
| 22Fe3K/ $\text{CuAl}_2\text{O}_4$                 | 15                                              | 0.11                                  |
| $\text{CuAl}_2\text{O}_4(\text{comm.})^a$         | 4                                               | 0.07                                  |
| 22Fe3K/ $\text{CuAl}_2\text{O}_4(\text{comm.})^a$ | 6                                               | 0.07                                  |

<sup>a</sup>Commercially available copper aluminum oxide purchased from Alfa Aesar

**Table S3** Comparison of the catalytic performance of 22Fe3K/CuAl<sub>2</sub>O<sub>4</sub> and 22Fe3K/CuAl<sub>2</sub>O<sub>4</sub>(comm.) as shown in Fig. S6, showing the effect of mesoporous structure.

| Catalyst                                        | Temp. (°C) | P (MPa) | GHSV (mL g <sub>cat</sub> <sup>-1</sup> h <sup>-1</sup> ) | CO <sub>2</sub> conv. (%) | CO sel. (%) | Hydrocarbon distribution (Excluding CO) |                  |                   |                  | C <sub>5+</sub> productivity (mL g <sub>cat</sub> <sup>-1</sup> h <sup>-1</sup> ) |
|-------------------------------------------------|------------|---------|-----------------------------------------------------------|---------------------------|-------------|-----------------------------------------|------------------|-------------------|------------------|-----------------------------------------------------------------------------------|
|                                                 |            |         |                                                           |                           |             | CH <sub>4</sub>                         | C <sub>2-4</sub> | C <sub>5-11</sub> | C <sub>12+</sub> |                                                                                   |
| 22Fe3K/CuAl <sub>2</sub> O <sub>4</sub>         | 320        | 3       | 10 000                                                    | 41.9                      | 10.2        | 12.5                                    | 33.0             | 48.9              | 5.6              | 429.4                                                                             |
| 22Fe3K/CuAl <sub>2</sub> O <sub>4</sub> (comm.) |            |         |                                                           | 30.2                      | 35.5        | 16.8                                    | 47.7             | 32.9              | 2.6              | 145.1                                                                             |

**Table S4** Effect of temperature on the catalytic performance of 22Fe3K/CuAl<sub>2</sub>O<sub>4</sub> as shown in Fig. S14.

| Catalyst                                | Temp. (°C) | P (MPa) | GHSV (mL g <sub>cat</sub> <sup>-1</sup> h <sup>-1</sup> ) | CO <sub>2</sub> conv. (%) | CO sel. (%) | Hydrocarbon distribution (Excluding CO) |                  |                   |                  | C <sub>5+</sub> productivity (mL g <sub>cat</sub> <sup>-1</sup> h <sup>-1</sup> ) |
|-----------------------------------------|------------|---------|-----------------------------------------------------------|---------------------------|-------------|-----------------------------------------|------------------|-------------------|------------------|-----------------------------------------------------------------------------------|
|                                         |            |         |                                                           |                           |             | CH <sub>4</sub>                         | C <sub>2-4</sub> | C <sub>5-11</sub> | C <sub>12+</sub> |                                                                                   |
| 22Fe3K/CuAl <sub>2</sub> O <sub>4</sub> | 300        | 3       | 10 000                                                    | 36.5                      | 14.6        | 14.5                                    | 40.8             | 42.2              | 2.4              | 275.5                                                                             |
|                                         | 320        |         |                                                           | 41.9                      | 10.2        | 12.5                                    | 33.0             | 48.9              | 5.6              | 429.4                                                                             |
|                                         | 350        |         |                                                           | 46.4                      | 10.9        | 14.0                                    | 30.6             | 48.6              | 6.8              | 479.5                                                                             |
|                                         | 400        |         |                                                           | 50.3                      | 14.3        | 27.4                                    | 39.8             | 30.3              | 2.4              | 295.8                                                                             |

**Table S5** Effect of pressure on the catalytic performance of 22Fe3K/CuAl<sub>2</sub>O<sub>4</sub> as shown in Fig. S15.

| Catalyst                                | Temp. (°C) | P (MPa) | GHSV (mL g <sub>cat</sub> <sup>-1</sup> h <sup>-1</sup> ) | CO <sub>2</sub> conv. (%) | CO sel. (%) | Hydrocarbon distribution (Excluding CO) |                  |                   |                  | C <sub>5+</sub> productivity (mL g <sub>cat</sub> <sup>-1</sup> h <sup>-1</sup> ) |
|-----------------------------------------|------------|---------|-----------------------------------------------------------|---------------------------|-------------|-----------------------------------------|------------------|-------------------|------------------|-----------------------------------------------------------------------------------|
|                                         |            |         |                                                           |                           |             | CH <sub>4</sub>                         | C <sub>2-4</sub> | C <sub>5-11</sub> | C <sub>12+</sub> |                                                                                   |
| 22Fe3K/CuAl <sub>2</sub> O <sub>4</sub> | 320        | 0.1     | 10 000                                                    | 20.8                      | 88.2        | 29.1                                    | 51.2             | 19.8              | -                | 2.0                                                                               |
|                                         |            | 1       |                                                           | 30.4                      | 30.3        | 15.4                                    | 45.1             | 37.4              | 2.1              | 163.3                                                                             |
|                                         |            | 2       |                                                           | 35.5                      | 18.6        | 13.8                                    | 38.7             | 45.0              | 2.6              | 276.8                                                                             |
|                                         |            | 3       |                                                           | 41.9                      | 10.2        | 12.5                                    | 33.0             | 48.9              | 5.6              | 429.4                                                                             |

**Table S6** Effect of the GHSV on the catalytic performance of 22Fe3K/CuAl<sub>2</sub>O<sub>4</sub> as shown in Fig. S16.

| Catalyst                                | Temp. (°C) | P (MPa) | GHSV (mL g <sub>cat</sub> <sup>-1</sup> h <sup>-1</sup> ) | CO <sub>2</sub> conv. (%) | CO sel. (%) | Hydrocarbon distribution (Excluding CO) |                  |                   |                  | C <sub>5+</sub> productivity (mL g <sub>cat</sub> <sup>-1</sup> h <sup>-1</sup> ) |
|-----------------------------------------|------------|---------|-----------------------------------------------------------|---------------------------|-------------|-----------------------------------------|------------------|-------------------|------------------|-----------------------------------------------------------------------------------|
|                                         |            |         |                                                           |                           |             | CH <sub>4</sub>                         | C <sub>2-4</sub> | C <sub>5-11</sub> | C <sub>12+</sub> |                                                                                   |
| 22Fe3K/CuAl <sub>2</sub> O <sub>4</sub> | 320        | 3       | 4000                                                      | 42.0                      | 10.2        | 15.2                                    | 39.0             | 40.7              | 5.1              | 142.9                                                                             |
|                                         |            |         | 10 000                                                    | 41.9                      | 10.2        | 12.5                                    | 33.0             | 48.9              | 5.6              | 429.4                                                                             |
|                                         |            |         | 15 000                                                    | 38.1                      | 14.7        | 14.4                                    | 39.7             | 37.8              | 8.1              | 462.2                                                                             |
|                                         |            |         | 20 000                                                    | 36.8                      | 16.5        | 14.3                                    | 40.4             | 37.7              | 7.6              | 565.0                                                                             |

**Table S7** Surface composition of as-synthesized  $22\text{Fe}_3\text{K}/\text{CuAl}_2\text{O}_4$  determined through EDS mapping (Fig. 3b).

| Element | Content |      |
|---------|---------|------|
|         | wt.%    | at.% |
| Fe      | 55.3    | 30.3 |
| K       | 0.8     | 0.6  |
| Cu      | 9.3     | 4.5  |
| Al      | 1.8     | 2.1  |
| O       | 32.8    | 62.6 |

**Table S8** Surface composition of the 22Fe3K/CuAl<sub>2</sub>O<sub>4</sub> catalyst after reduction determined by EDS mapping (Fig. 3f).

| Element | Content |      |
|---------|---------|------|
|         | wt.%    | at.% |
| Fe      | 20.4    | 9.5  |
| K       | 1.6     | 1.0  |
| Cu      | 17.8    | 7.3  |
| Al      | 24.3    | 23.5 |
| O       | 35.9    | 58.6 |

**Table S9** Surface composition of the 22Fe3K/CuAl<sub>2</sub>O<sub>4</sub> catalyst after the 40 h reaction determined by EDS mapping (Fig. 3i).

| Element | Content |      |
|---------|---------|------|
|         | wt.%    | at.% |
| Fe      | 35.3    | 21.0 |
| K       | 1.7     | 1.4  |
| Cu      | 23.9    | 12.5 |
| Al      | 18.9    | 23.3 |
| O       | 20.2    | 41.8 |
